# Supplementary material
Source: publisher site journal article supplement (https://www.spandidos-publications.com/3393/downloadSupplementary)
Supplement: Supplementary file 1 [file downloadSupplementary]

Figure S1. Effects of mannitol and HG on protein expression of salusin- $\beta$  in HK-2 cells. HK-2 cells were incubated with NG (5.5 mM), mannitol (30 mM) or HG (30 mM) for 48 h. (A) Representative blot images and semi-quantitative analysis of salusin- $\beta$  protein expression. (B) Salusin- $\beta$  mRNA expression was determined by performing reverse transcription-quantitative PCR. (C) Salusin- $\beta$  levels were determined by ELISA. (D) Iron and (E) GSH contents. (F) MDA levels. (G) Cell viability was evaluated by performing the Cell Counting Kit-8 assay. Data are presented as the mean  $\pm$  SD (n=5 per group). \*P<0.05 vs. NG. HG, high glucose; NG, normal glucose; GSH, glutathione; MDA, malondialdehyde.

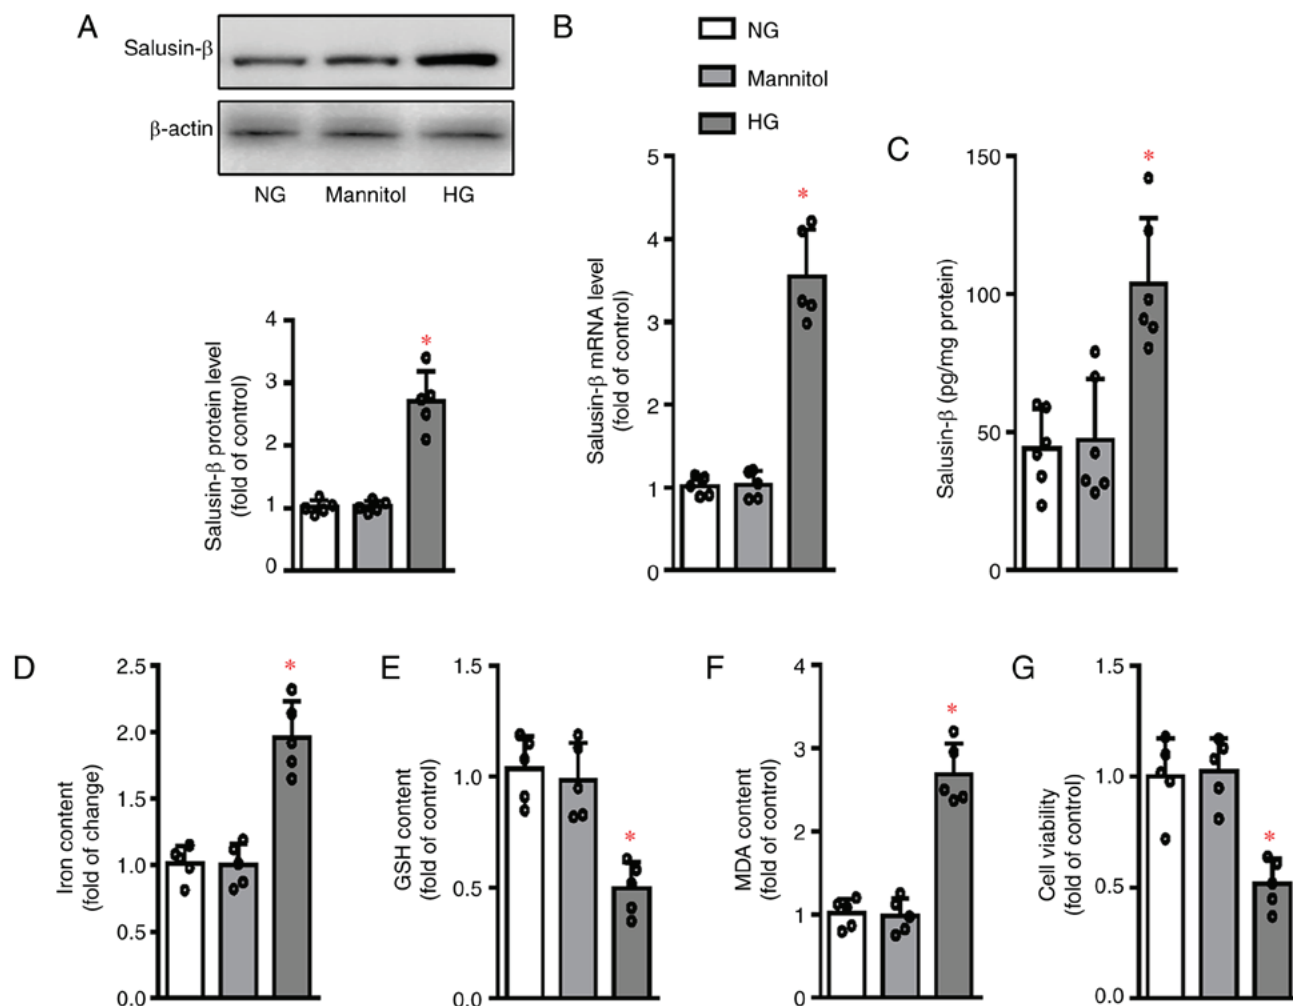

Figure S2. Expression of salusin- $\beta$  in HK-2 cells. (A) Effects of salusin- $\beta$  shRNA on salusin- $\beta$  protein expression. (B) Effects of salusin- $\beta$  overexpression on salusin- $\beta$  protein expression. Data are presented as the mean  $\pm$  SD (n=5 per group). \*P<0.05 vs. Con shRNA or Vector. OE, overexpression; Con, control; sh, short hairpin RNA.

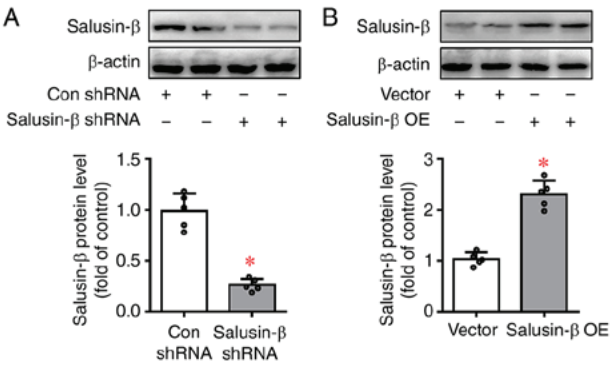

Figure S3. Expression of *Nrf-2* in HK-2 cells. A non-targeting control siRNA (50 nM) and *Nrf-2* siRNA (50 nM) were transfected to HK-2 cells for 48 h. Effects of *Nrf-2* siRNA on *Nrf-2* protein expression were determined. Data are presented as the mean  $\pm$  SD (n=5 per group). \*P<0.05 vs. Con siRNA. *Nrf-2*, nuclear factor erythroid-derived 2-like 2; Con, control; si, small interfering RNA.

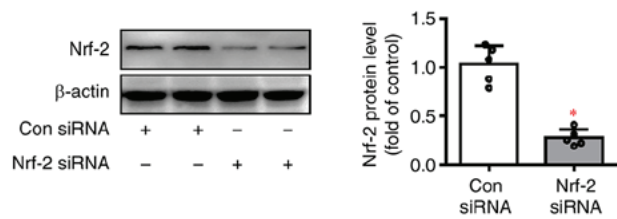

Table SI. Sequences of primers used for reverse transcription-quantitative PCR in HK-2 cells.

| Gene             | Sequence (5'→3')                                          |
|------------------|-----------------------------------------------------------|
| <i>GAPDH</i>     | F: CCACATCGCTCAGACACCAT<br>R: CCAGGCGCCCAATACG            |
| <i>Salusin-β</i> | F: GGGTGGTATACGGGACCAAT<br>R: ACAGCCTGGACAACCTCATC        |
| <i>GPX-4</i>     | F: GGCTTCGTGTGCATCGTCACC<br>R: TTCACCACGCAGCCGTTCTTG      |
| <i>SLC7A11</i>   | F: CGCAAGCACACTCCTCTACCAG<br>R: TCAGAGTGATGACGAAGCCAATCC  |
| <i>TFR-1</i>     | F: TGTGGCGTATAGTAAGGCTGCAAC<br>R: GGCAATCCTGATGACCGAGATGG |
| <i>FTH-1</i>     | F: AGAACTACCACCAGGACTCAGAGG<br>R: GGAAGATTCGGCCACCTCGTTG  |

*GPX-4*, glutathione peroxidase 4; *SLC7A11*, solute carrier family 7 (cationic amino acid transporter, y+ system) member 11; *TFR-1*, transferrin receptor 1; *FTH-1*, ferritin heavy polypeptide 1; F, forward; R, reverse.
